# Supplementary material
Source: PubMed Central journal article supplement (PMC2756829)

**Supplementary Figure 4**

**A.**

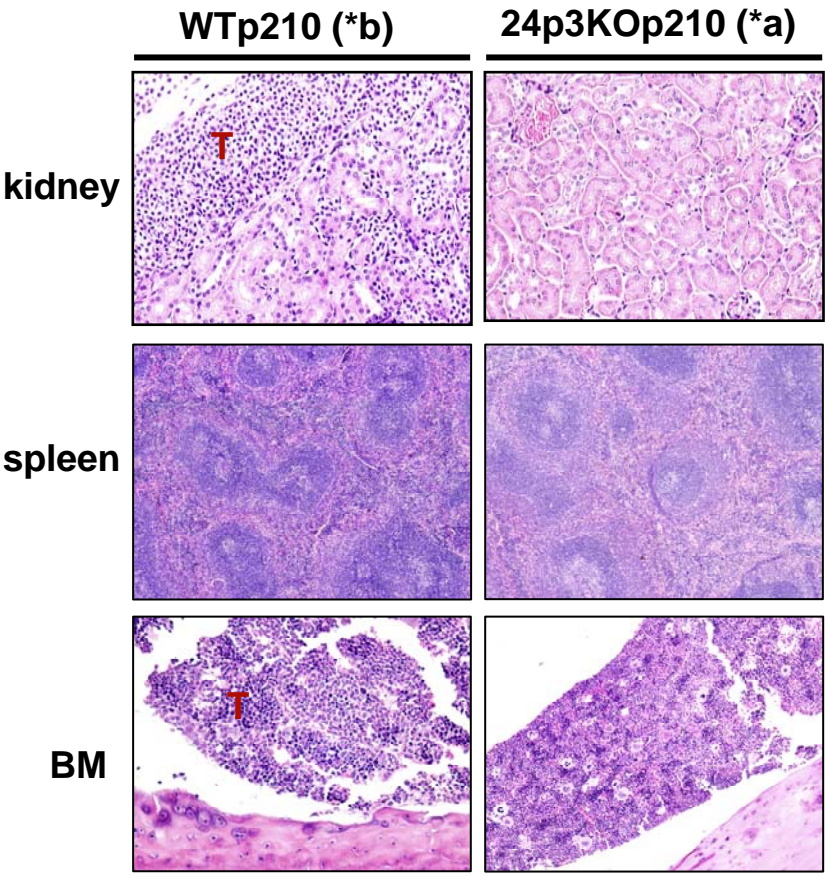

**B.**

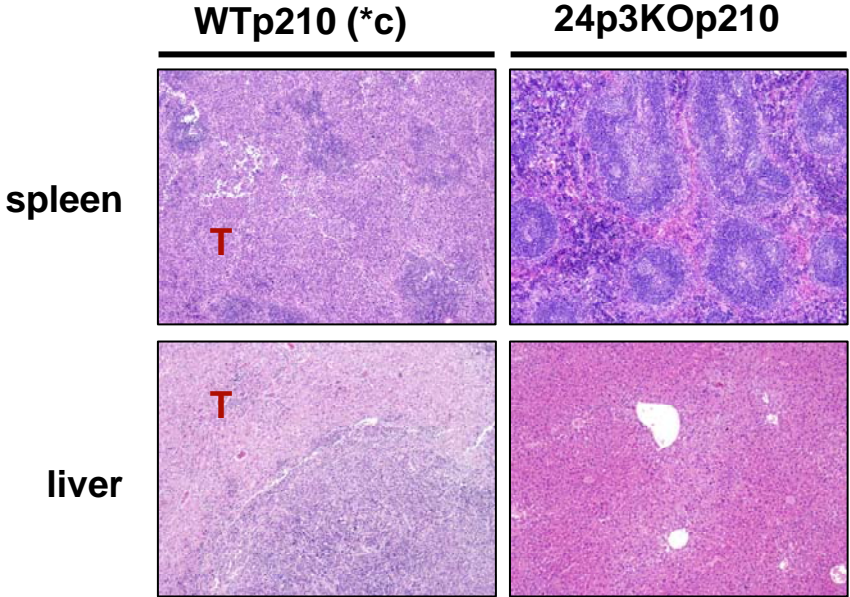

**C.**

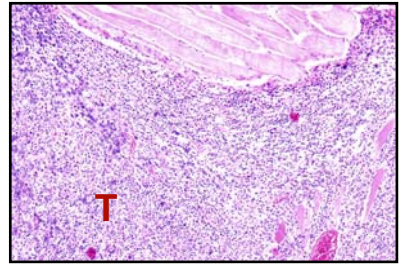

## Supplementary Figure 4

**D.**

|                                     | WTp210 (*b)          | 24p3KOp210 (*a)      |
|-------------------------------------|----------------------|----------------------|
| White blood cell                    | 6000/ul              | 3450/ul              |
| Red blood cell                      | 4.93X10 <sup>6</sup> | 8.75X10 <sup>6</sup> |
| Hemoglobin                          | 7.40g/L              | 14.3g/L              |
| Hematocrit                          | 22.4%                | 40.2%                |
| White blood cell differential count |                      |                      |
| Segs                                | 67.8%                | 24%                  |
| Lymphs                              | 15.6%                | 66%                  |
| monos                               | 15.1%                | 9%                   |

**E.**

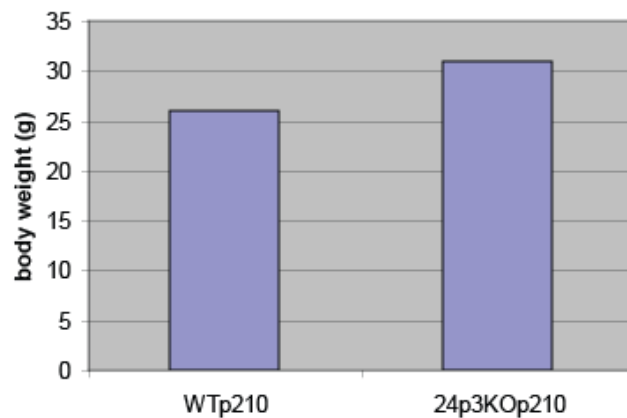

Supplement: NIHMS78183-supplement-Supp_Fig_4.pdf [file NIHMS78183-supplement-Supp_Fig_4.pdf]
