# Supplementary material
Source: PubMed Central journal article supplement (PMC2756829)

# Supplementary Figure 1

A.

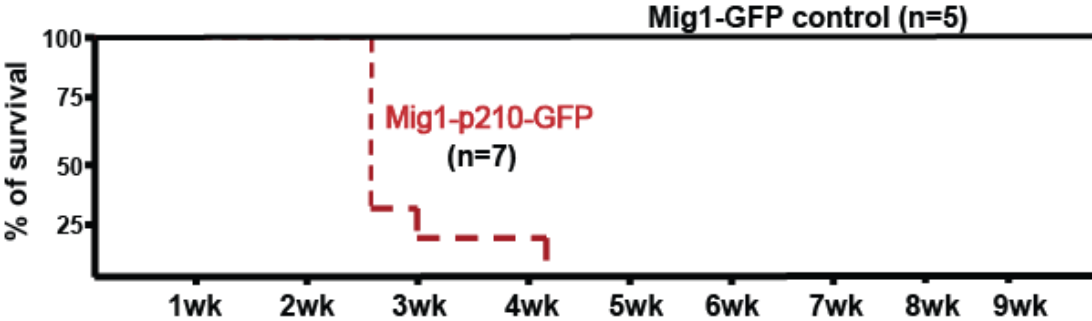

B.

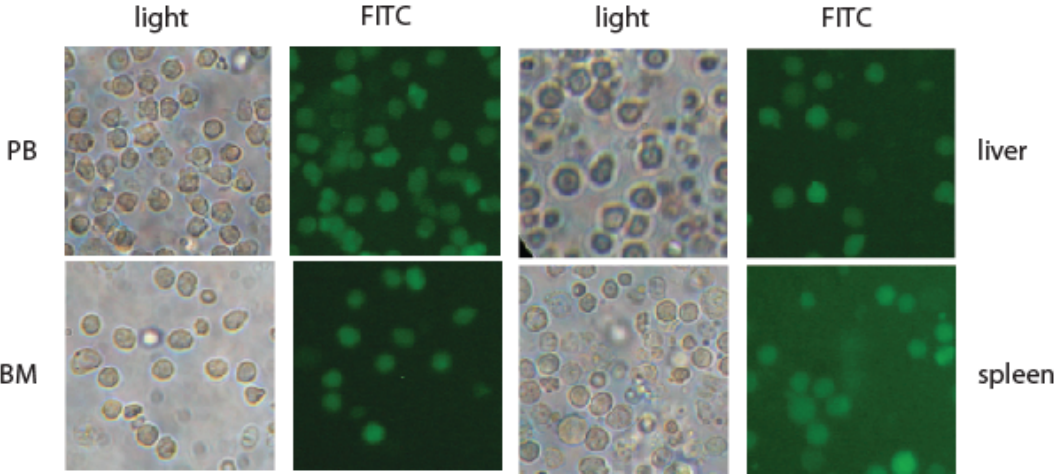

C.

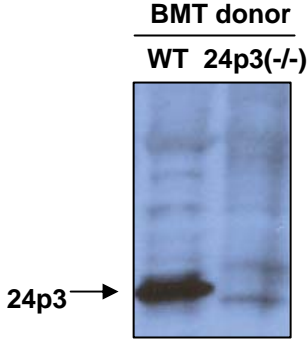

Supplement: NIHMS78183-supplement-Supp_Fig_1.pdf [file NIHMS78183-supplement-Supp_Fig_1.pdf]

**Supplementary Figure 2**

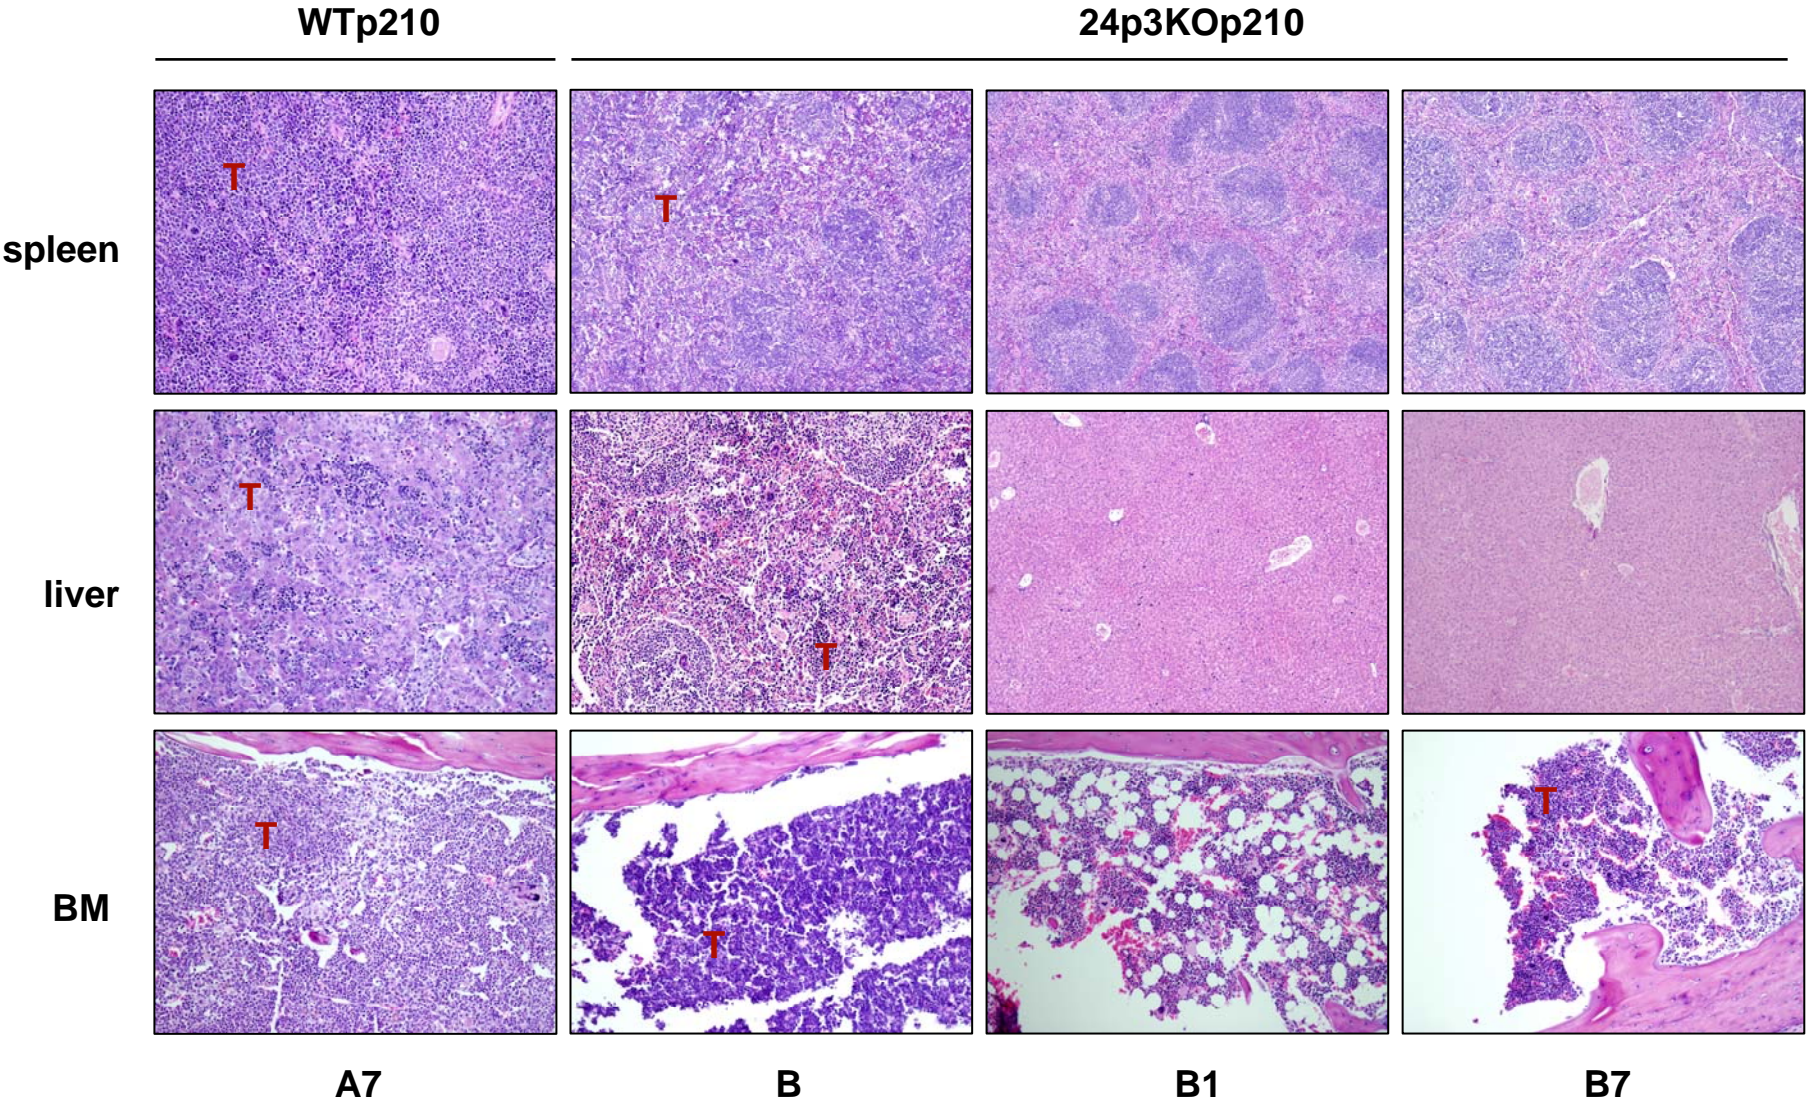

Supplement: NIHMS78183-supplement-Supp_Fig_2.pdf [file NIHMS78183-supplement-Supp_Fig_2.pdf]

## Supplementary Figure 3

A.

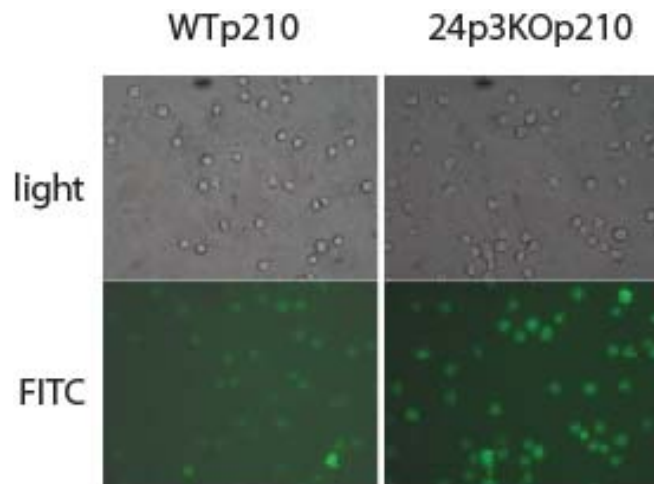

B.

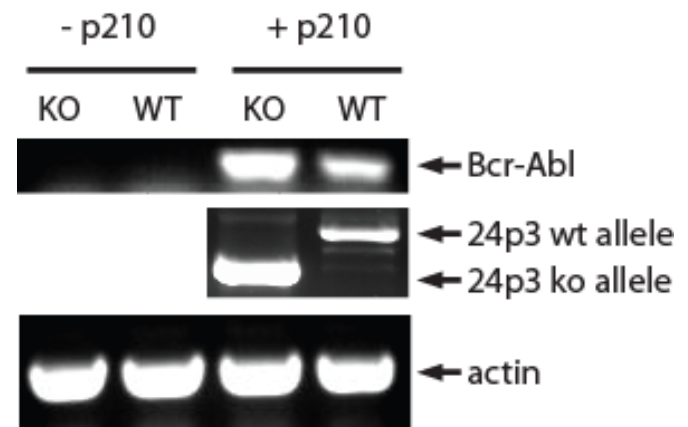

Supplement: NIHMS78183-supplement-Supp_Fig_3.pdf [file NIHMS78183-supplement-Supp_Fig_3.pdf]

# Supplementary Figure 5

**A.**

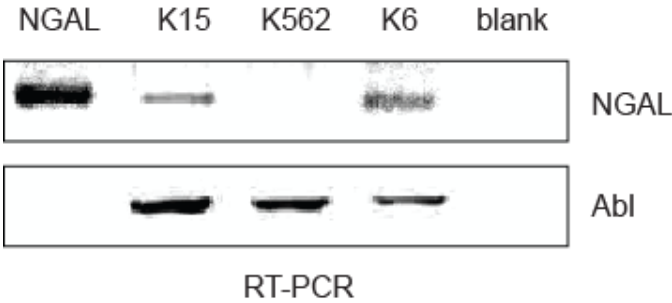

**B.**

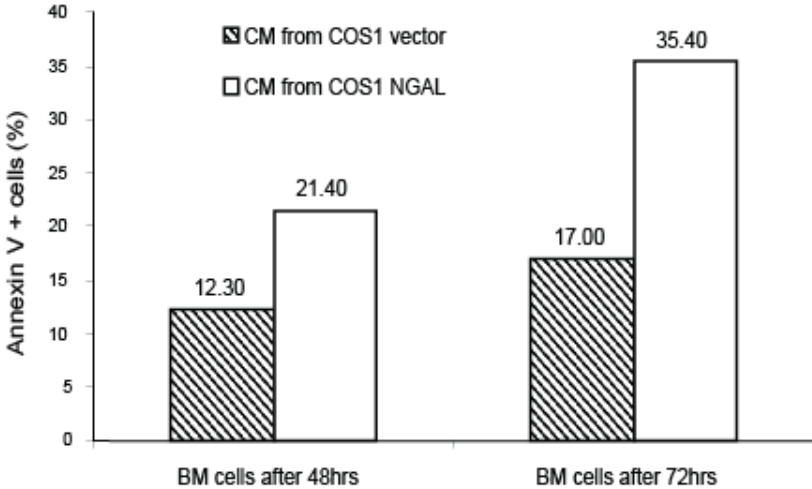

Supplement: NIHMS78183-supplement-Supp_Fig_5.pdf [file NIHMS78183-supplement-Supp_Fig_5.pdf]

**Supplementary Figure 6**

**A.**

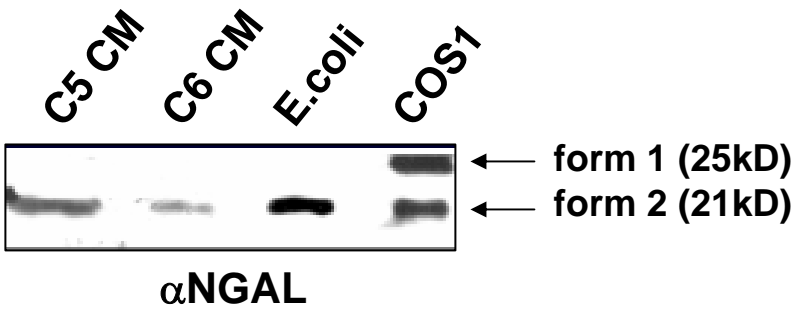

**B.**

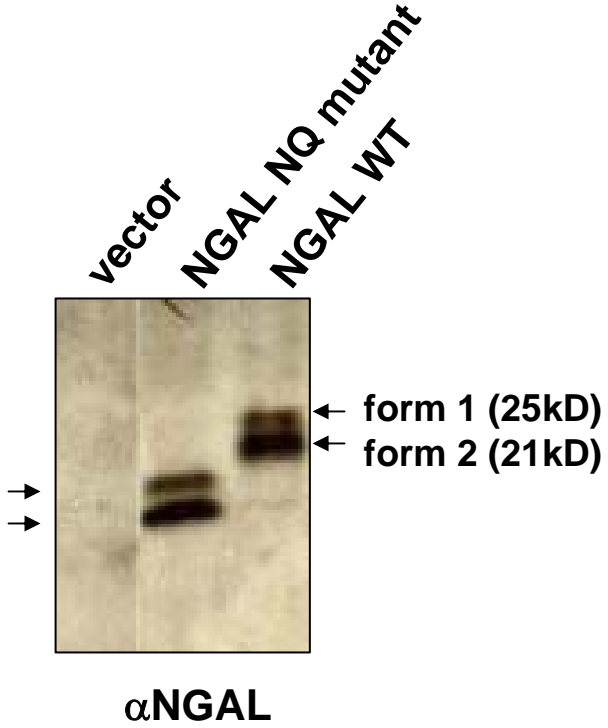

Supplement: NIHMS78183-supplement-Supp_Fig_6.pdf [file NIHMS78183-supplement-Supp_Fig_6.pdf]
